# Supplementary material for: Oxidative Stress Markers and Heat Shock Proteins in Non-Obese Women with Polycystic Ovary Syndrome Are Not Elevated and Show No Correlation with Vitamin D
Source: MDPI journal article supplement (doi:10.3390/biomedicines11072044), 2023-07-20

Supplementary Figure S1. Lack of correlation of oxidative stress proteins with 25(OH)D<sub>3</sub>

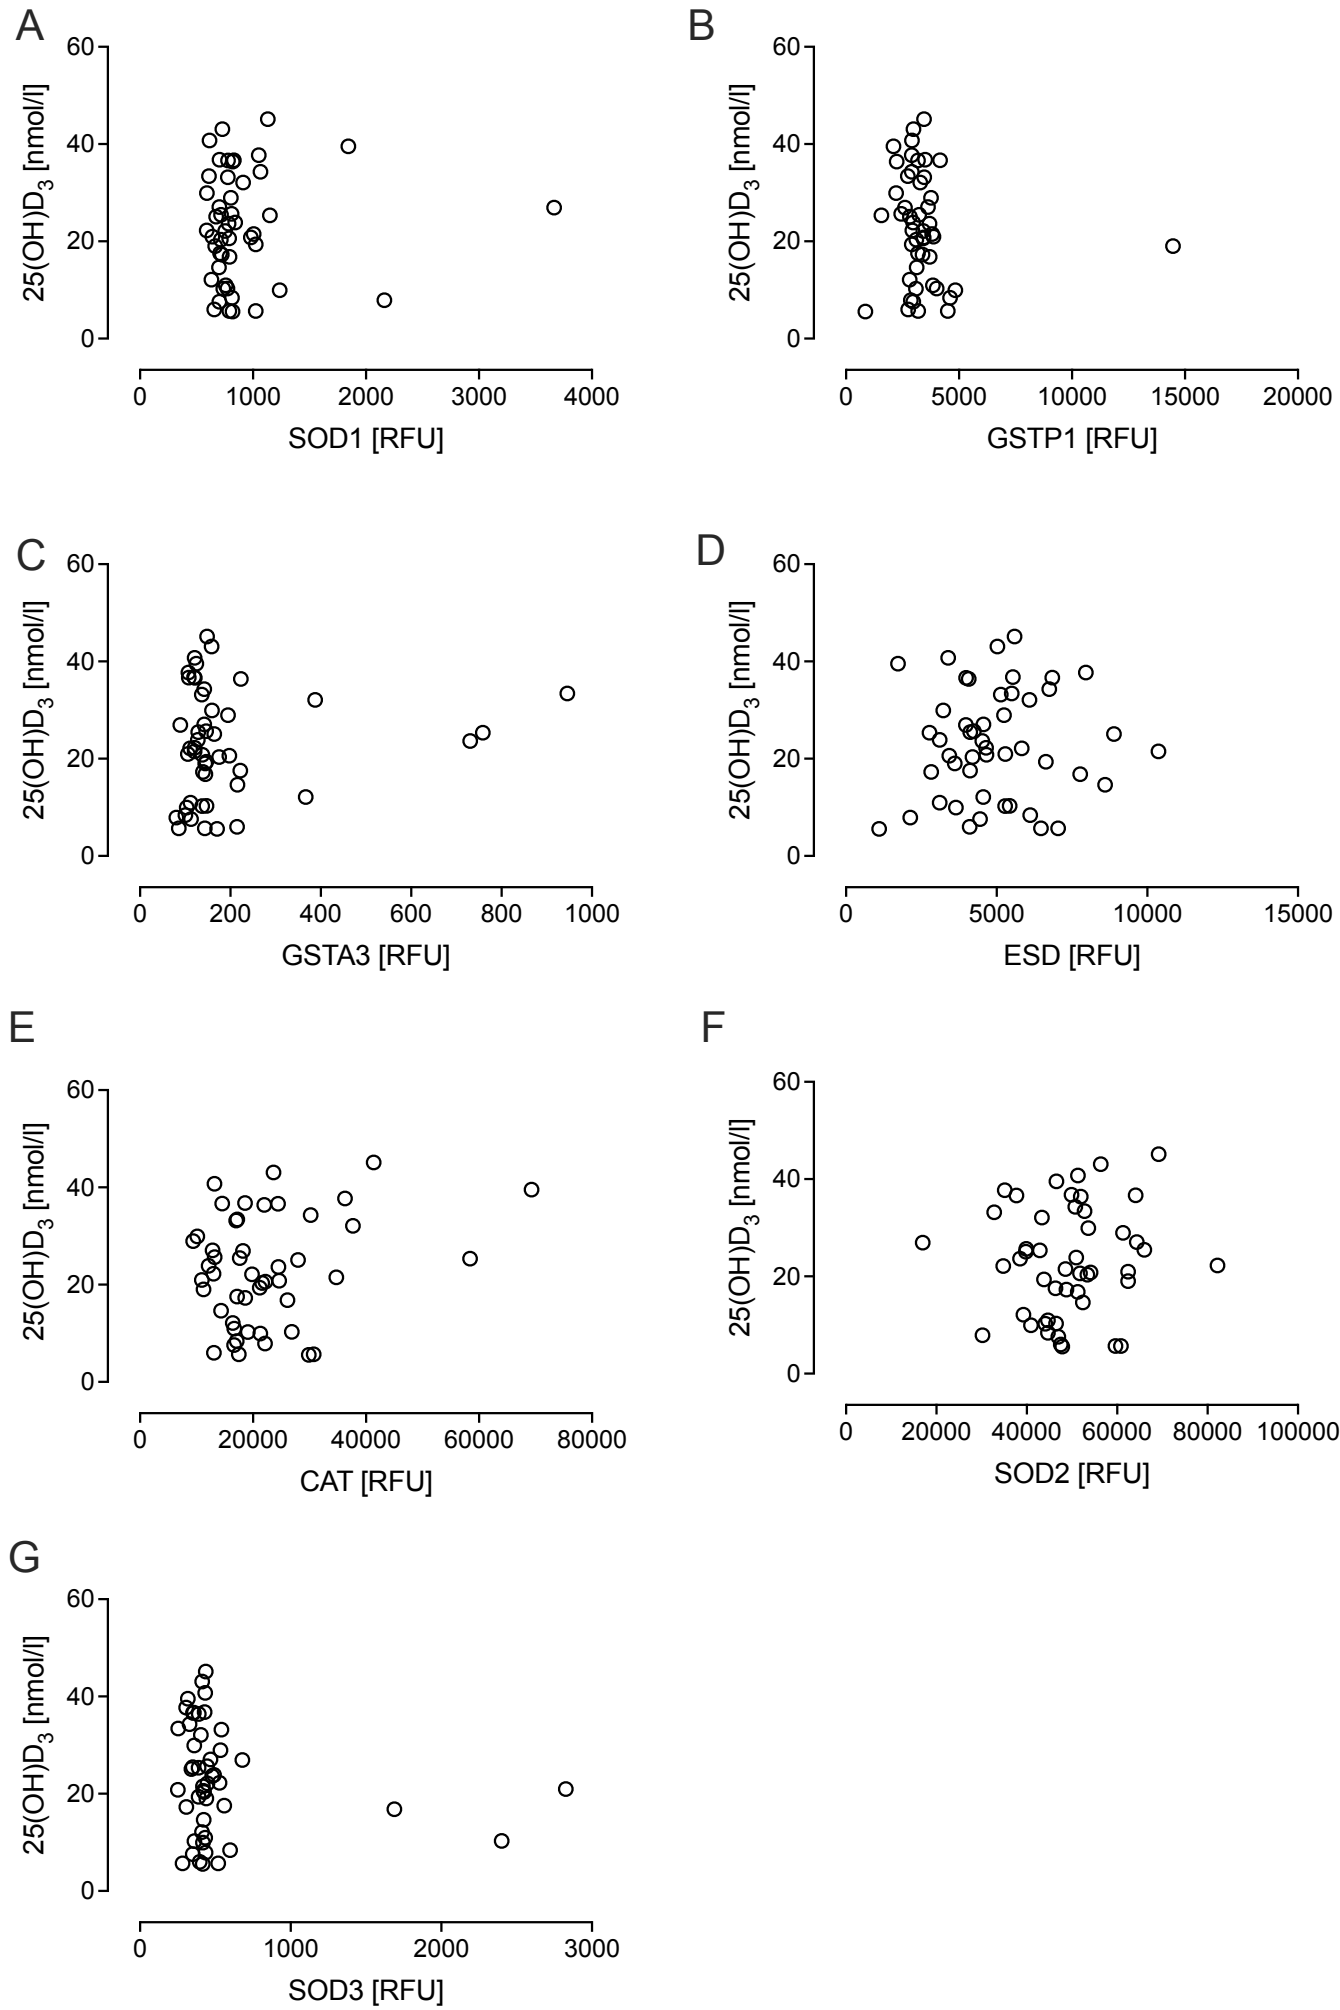

Supplementary Figure S2. Lack of correlation of oxidative stress proteins with 1,25(OH)<sub>2</sub>D<sub>3</sub>

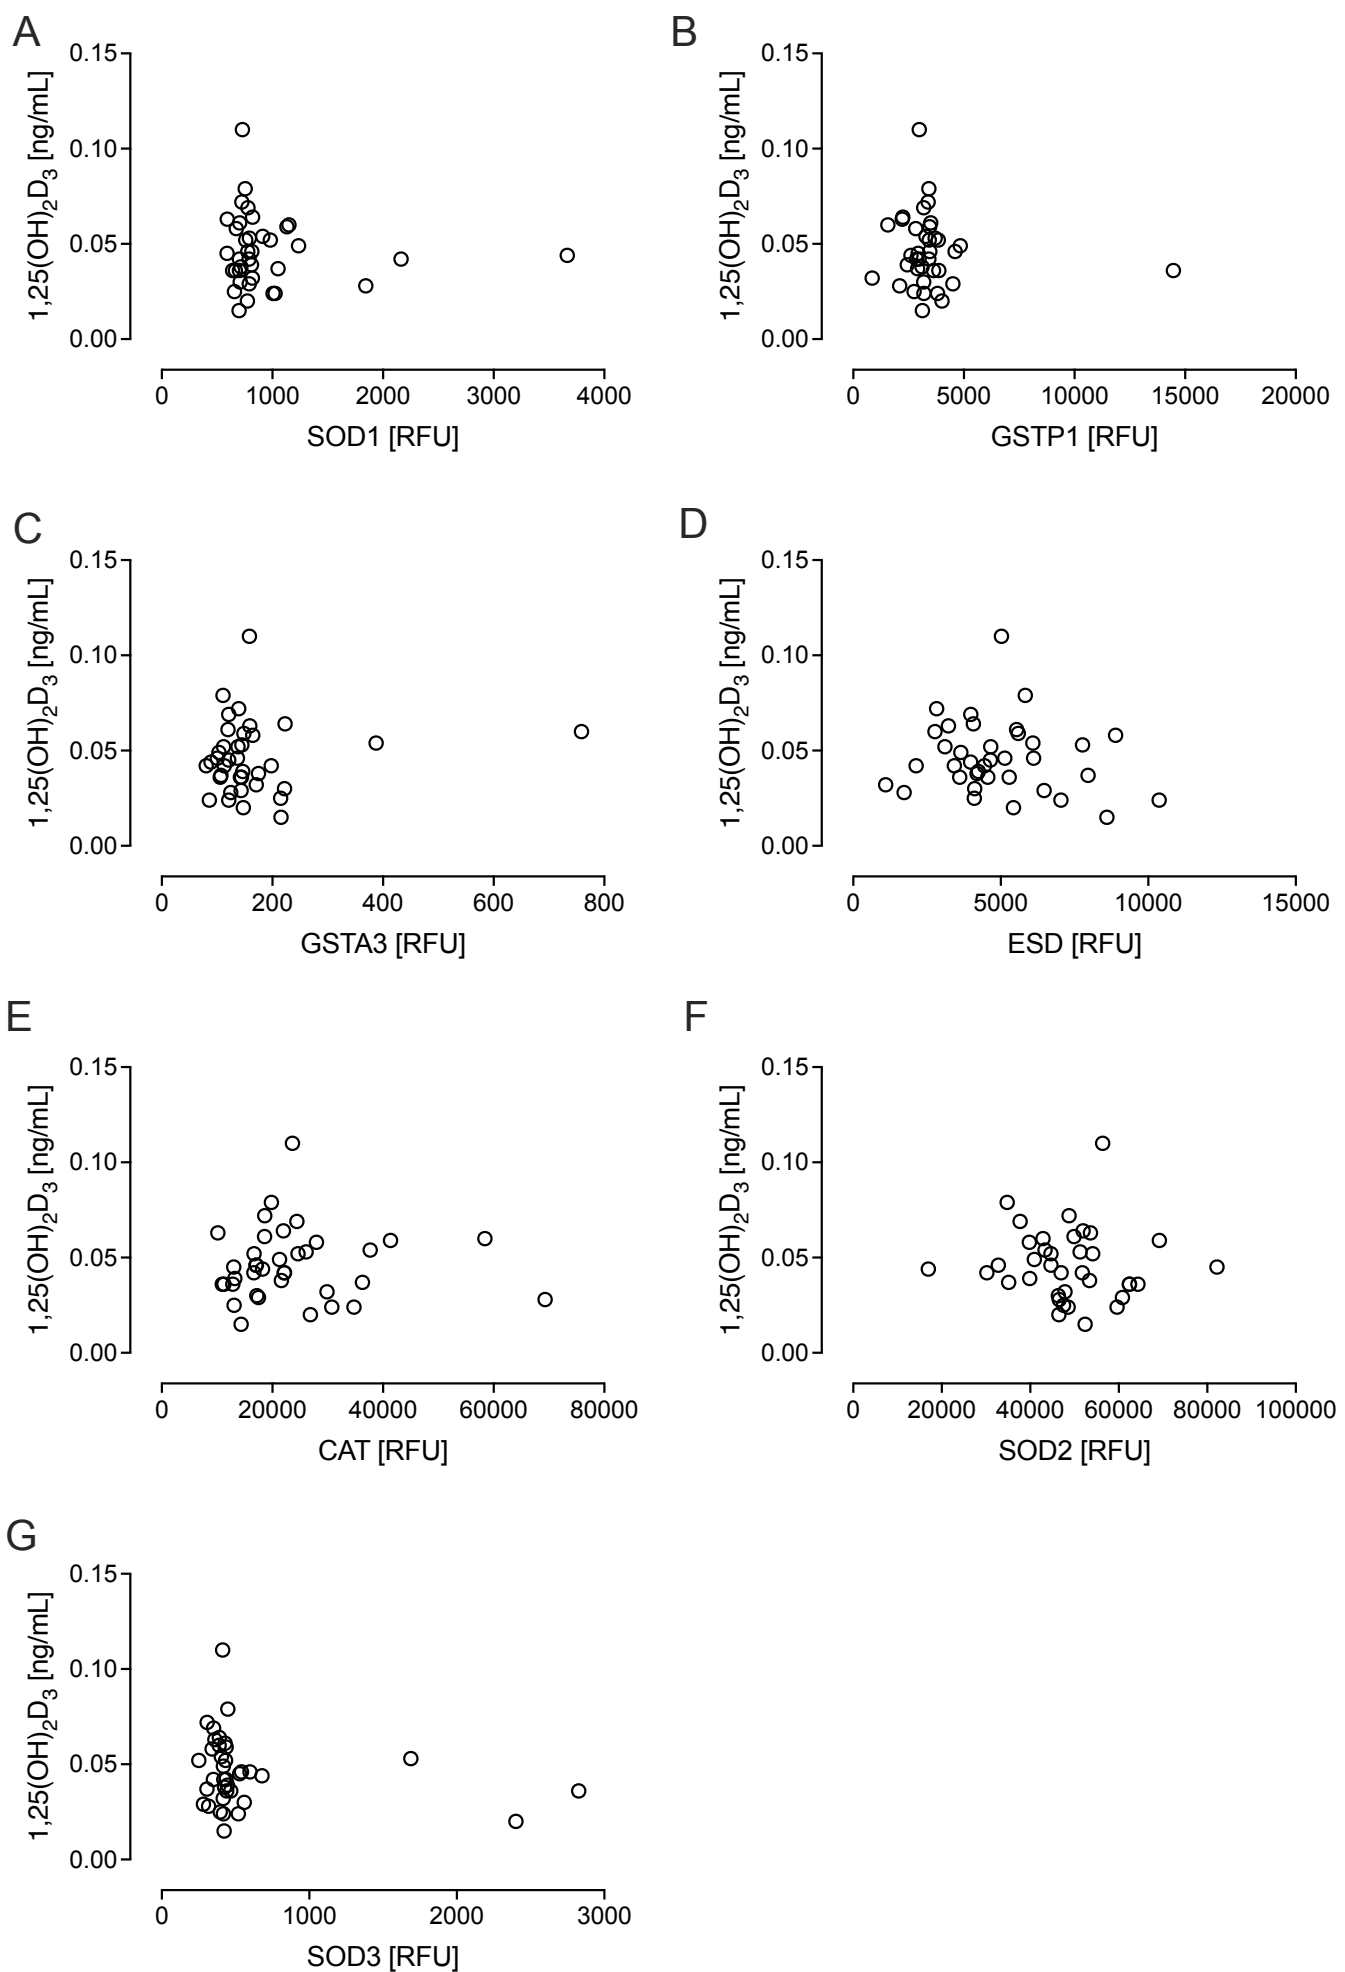

Supplementary Figure S3. Lack of correlation of heat shock proteins with 25(OH)D<sub>3</sub>

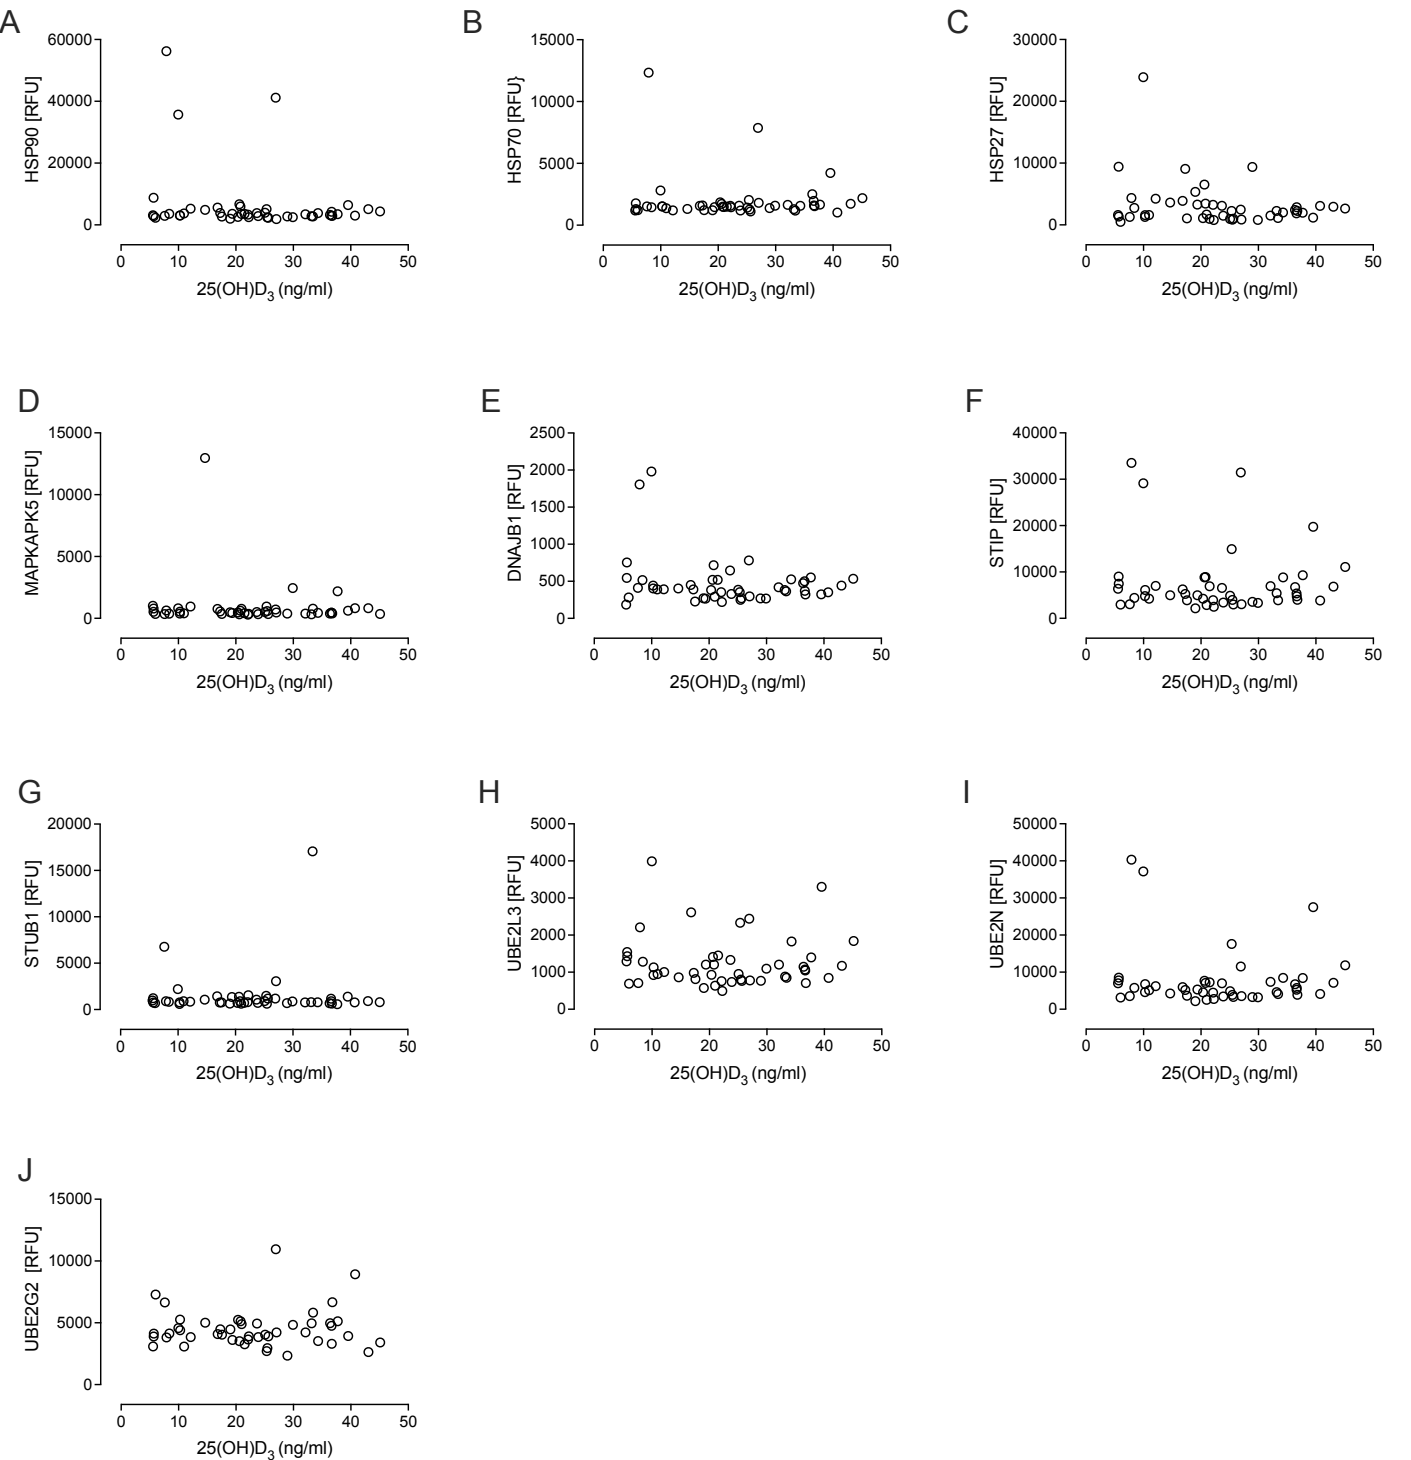

Supplementary Figure S4 .Lack of correlation of heat shock proteins with 1,25(OH)<sub>2</sub>D<sub>3</sub>

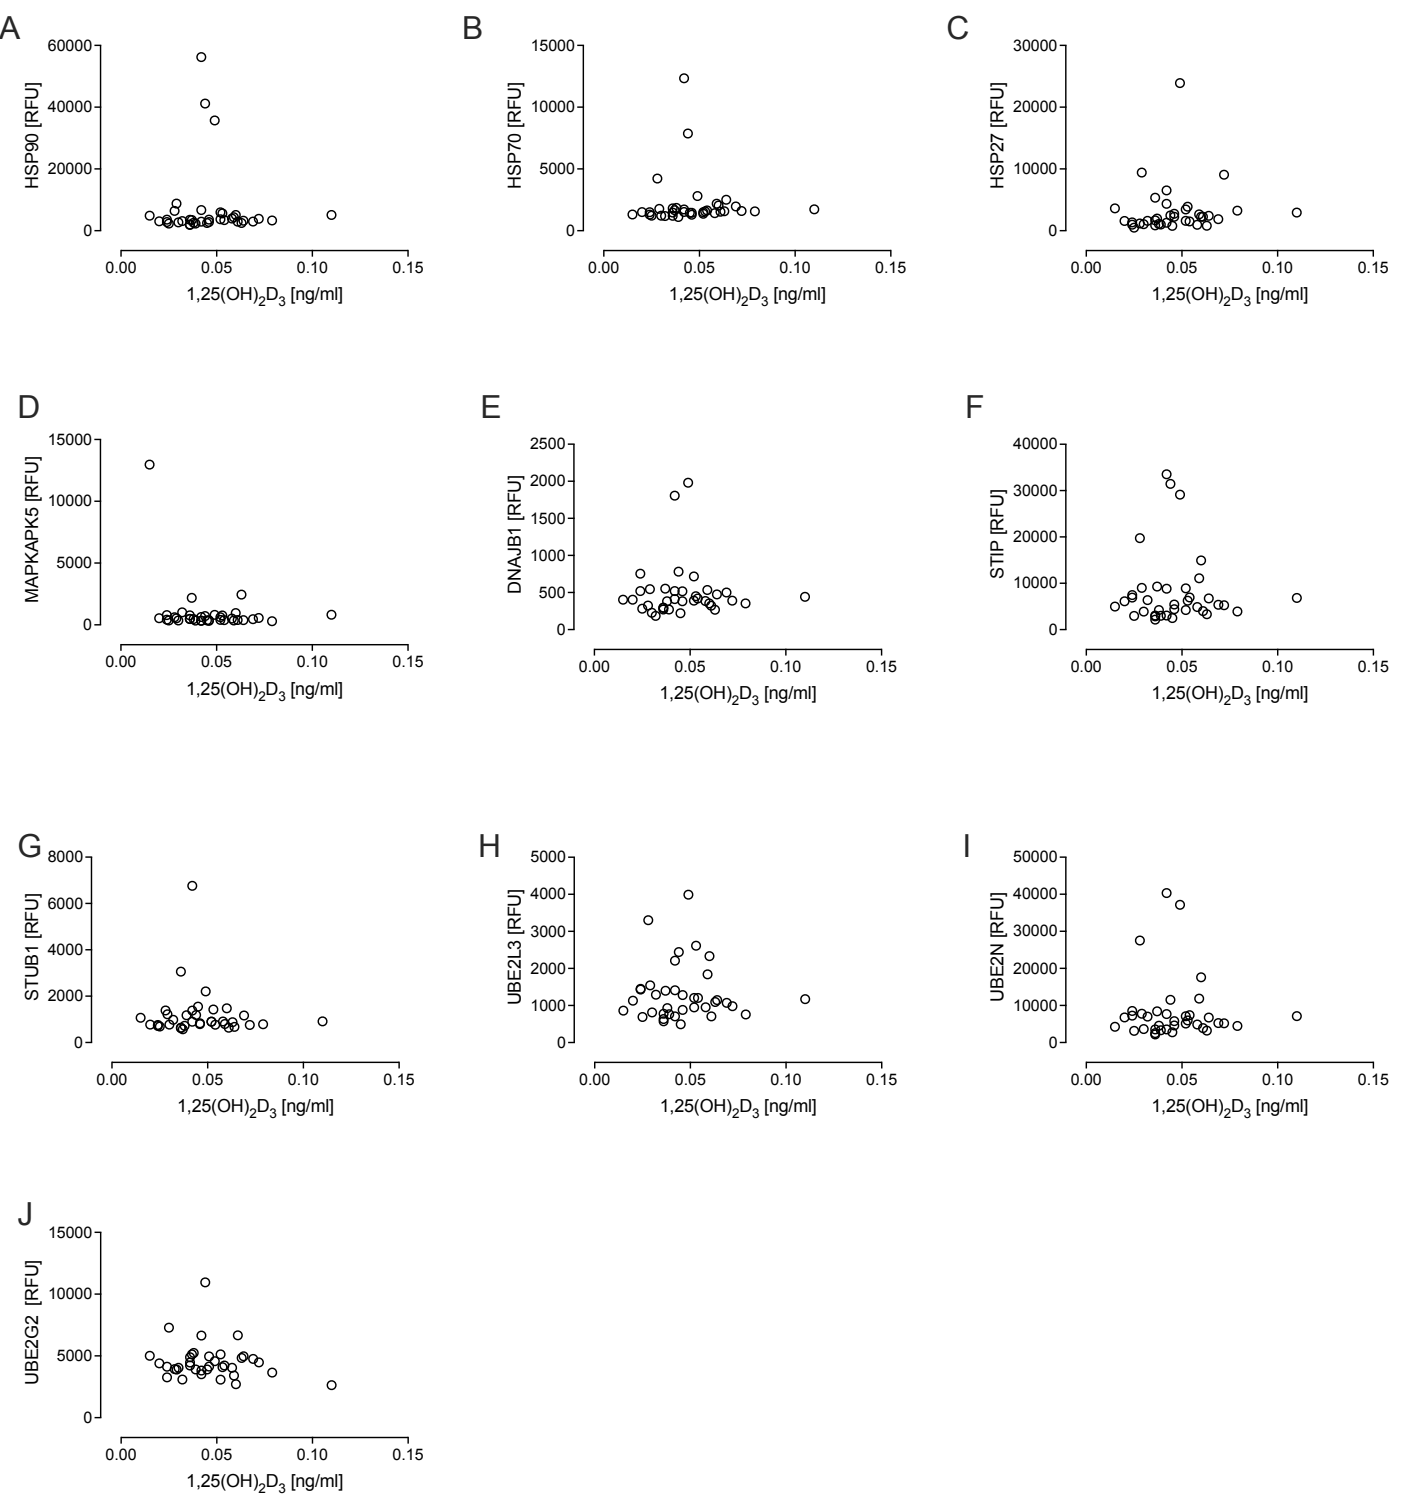

Supplement: s1 [file s1]
